# Supplementary material for: Construction of high-temperature electronic conduction paths for the scale-up of solid oxide fuel cell technology
Source: Royal Society of Chemistry journal article supplement (doi:10.1039/d2ta02468c), 2022-01-01
Supplement: d2ta02468c1.pdf [file d2ta02468c1.pdf]

*Supporting Information*

**Construction of High-Temperature Electronic Conduction Paths for the  
Scale-up of Solid Oxide Fuel Cell Technology**

Mi Young Park<sup>1,2</sup>, Sun-Young Park<sup>3</sup>, Haewon Seo<sup>1</sup>, Jin-Mook Jung<sup>4</sup>, Hyo Ki Hwang<sup>4</sup>,  
Jongsup Hong<sup>5,6</sup>, Jun-Young Park<sup>7</sup>, Insung Lee<sup>4\*</sup>, Kyung Joong Yoon<sup>1,6\*</sup>

<sup>1</sup>High-Temperature Energy Materials Research Center, Korea Institute of Science and  
Technology, Seoul, Korea

<sup>2</sup>Department of Materials Science and Engineering, Korea University, Seoul, Korea

<sup>3</sup> Technological Convergence Center, Korea Institute of Science and Technology, Seoul,  
Korea

<sup>4</sup> E&KOA, Daejeon, Korea

<sup>5</sup>School of Mechanical Engineering, Yonsei University, Seoul, Korea

<sup>6</sup>Yonsei-KIST Convergence Research Institute, Seoul, Korea

<sup>7</sup>Nanotechnology and Advanced Materials Engineering, Sejong University, Seoul, Korea

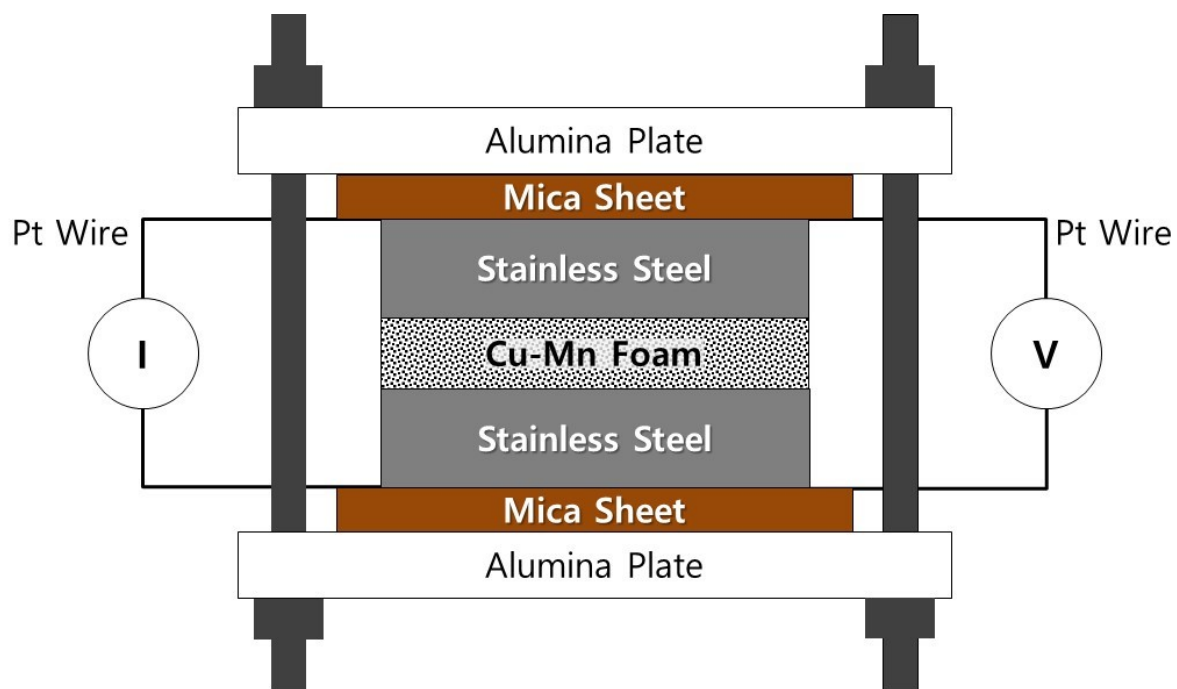

**Figure S1.** Schematic of the ASR measurement setup.

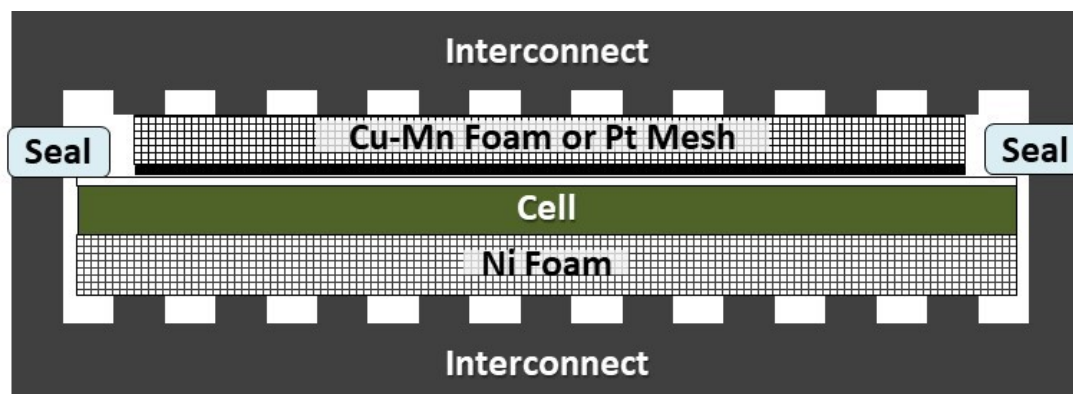

**Figure S2.** Schematic of the unit cell testing setup.

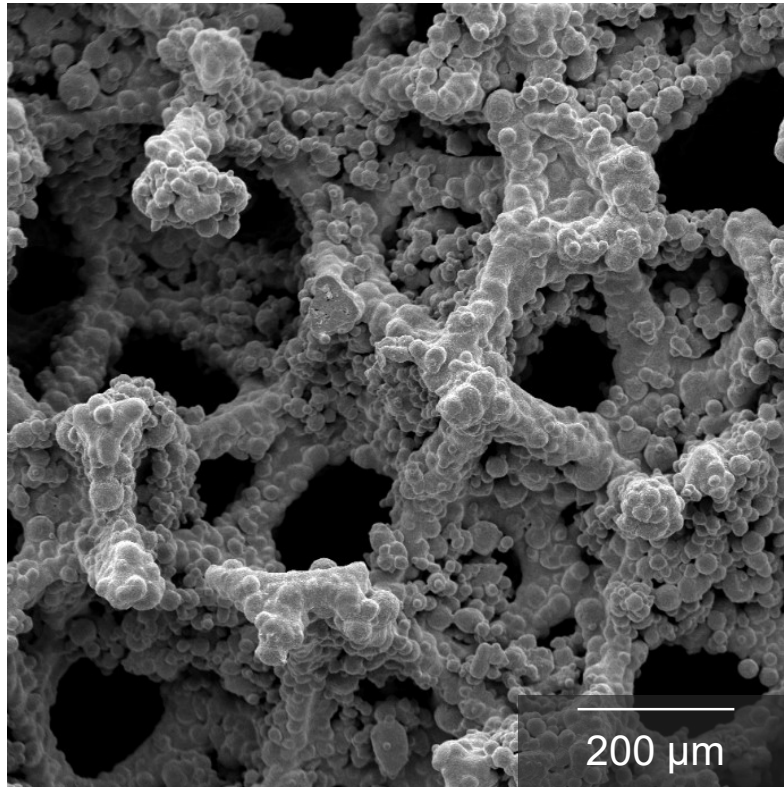

**Figure S3.** SEM image of the Cu-Mn foam heat-treated at 800°C for 2 hours.

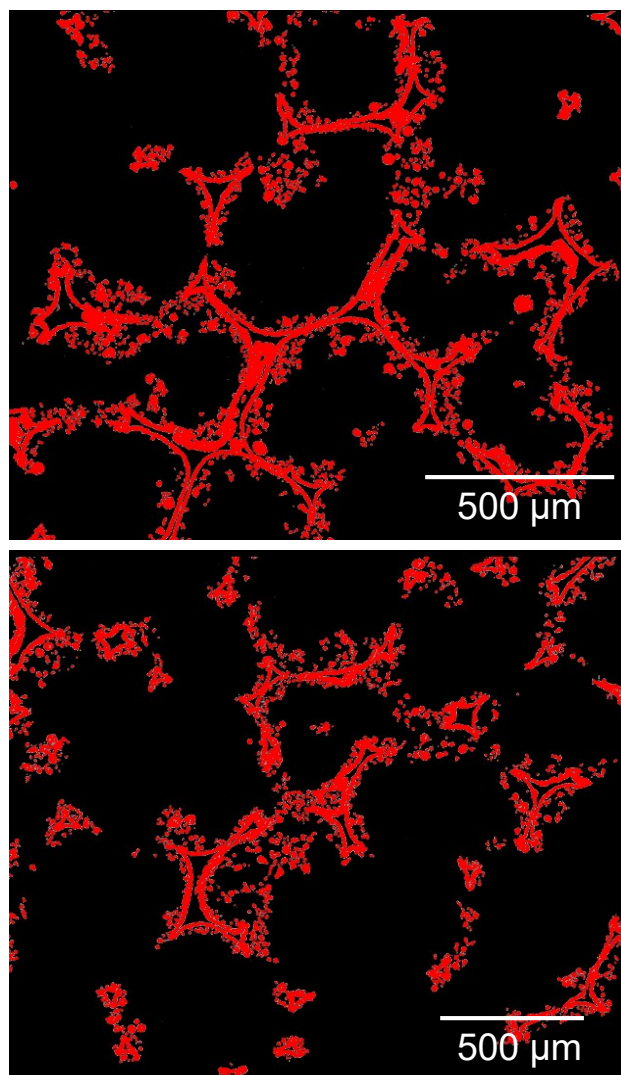

**Figure S4.** Example of image analysis of Cu-Mn foam for the calculation of porosity.

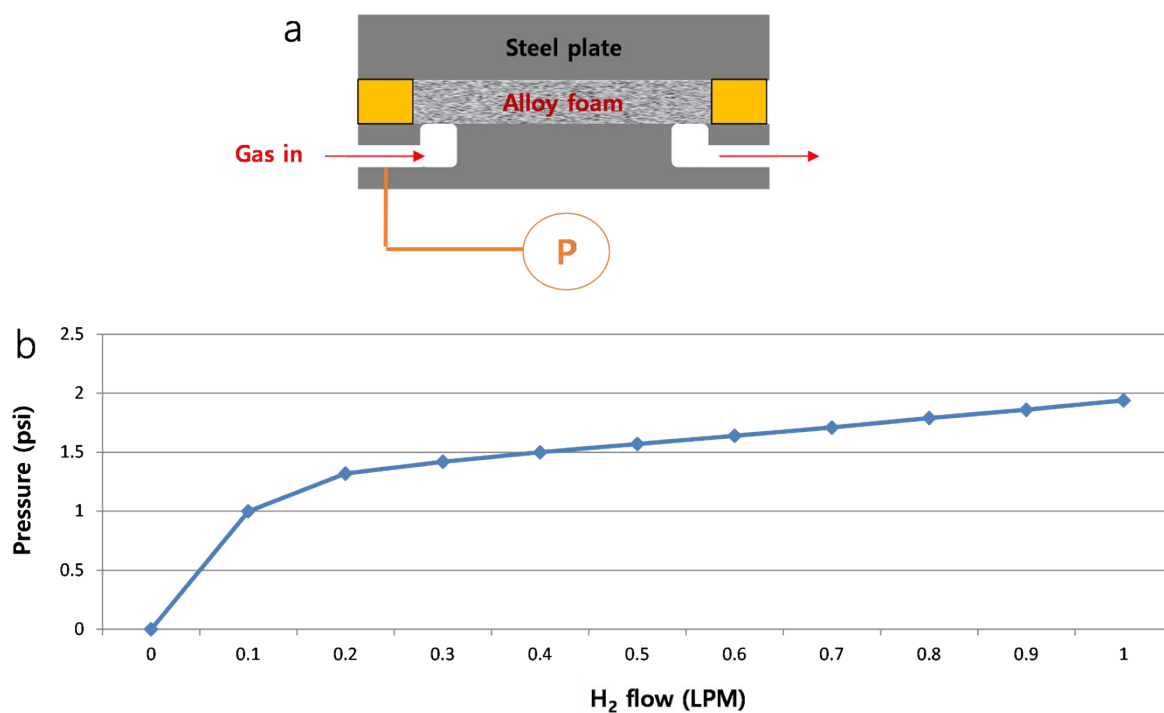

**Figure S5.** (a) Schematic of gas permeability measurement setup, and (b) measured pressure as a function of gas flow rate. No pressure drop occurs across Cu-Mn foam, indicating facile gas transport.

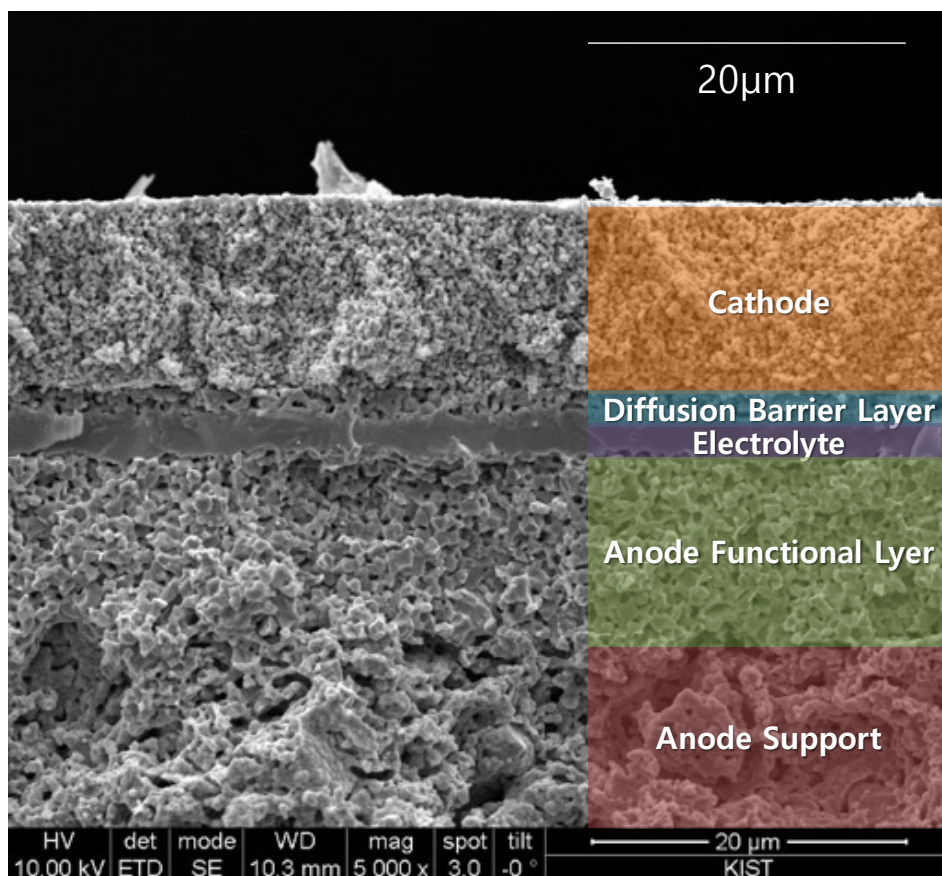

**Figure S6.** SEM image of the cross-section of tested button cell.

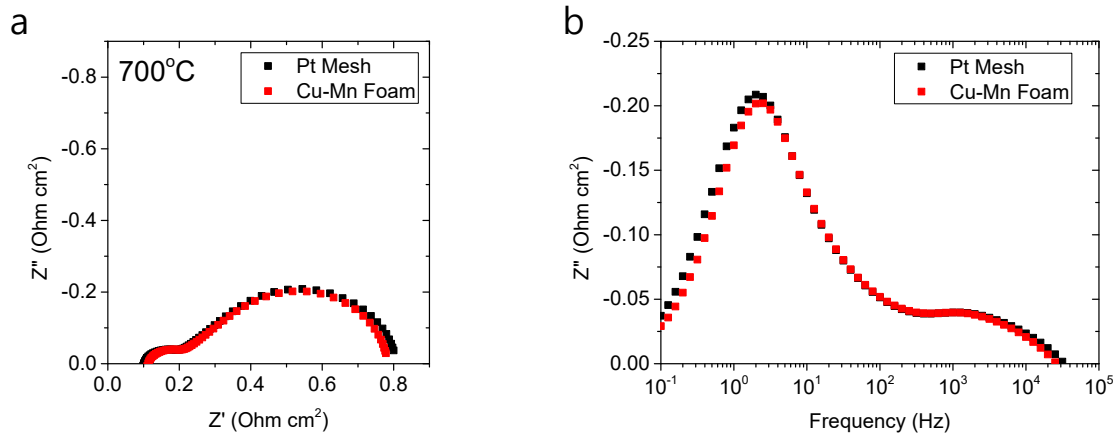

**Figure S7.** (a) Nyquist and (b) Bode plots of impedance spectra of the cells tested with Pt mesh and Cu-Mn foam measure at 700°C.





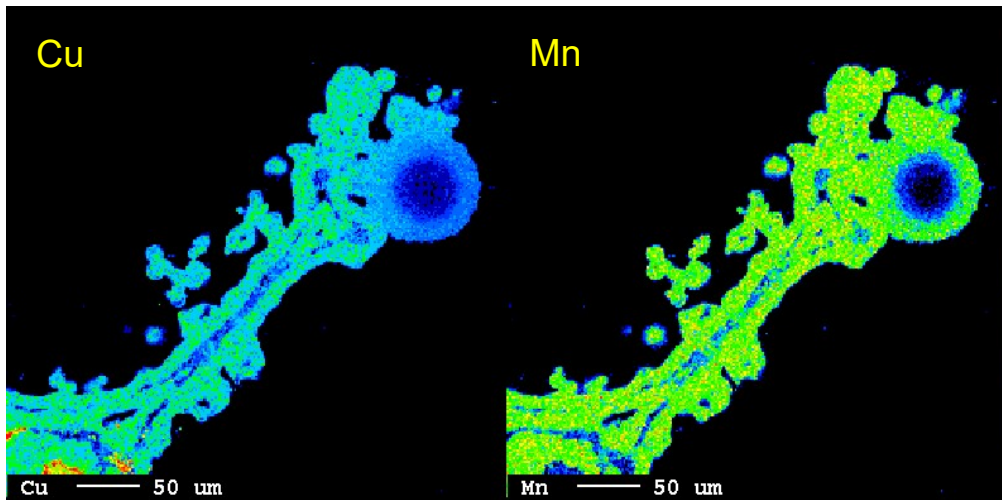

**Figure S9.** EPMA elemental analysis of Cu–Mn foam after stack testing.
